# Supplementary material for: In situ TEM observations of void movement in Ag nanowires affecting the electrical properties under biasing
Source: Royal Society of Chemistry journal article supplement (doi:10.1039/d1cc03300j), 2021-01-01
Supplement: d1cc03300j2.pdf [file d1cc03300j2.pdf]

## Supporting Information

### In-situ TEM observations of void movement in Ag nanowire to the electrical properties under biasing

Yu-Hsiang Hsueh,<sup>a</sup> Ashok Ranjan,<sup>a</sup> Lian-Ming Lyu,<sup>a</sup> Kai-Yuan Hsiao,<sup>a</sup> and Ming-Yen Lu<sup>\*ab</sup>

<sup>a</sup>. Department of Materials Science and Engineering, National Tsing Hua University, Hsinchu 300, Taiwan. E-mail: mylu@mx.nthu.edu.tw

<sup>b</sup>. High Entropy Materials Center, National Tsing Hua University, Hsinchu 300, Taiwan

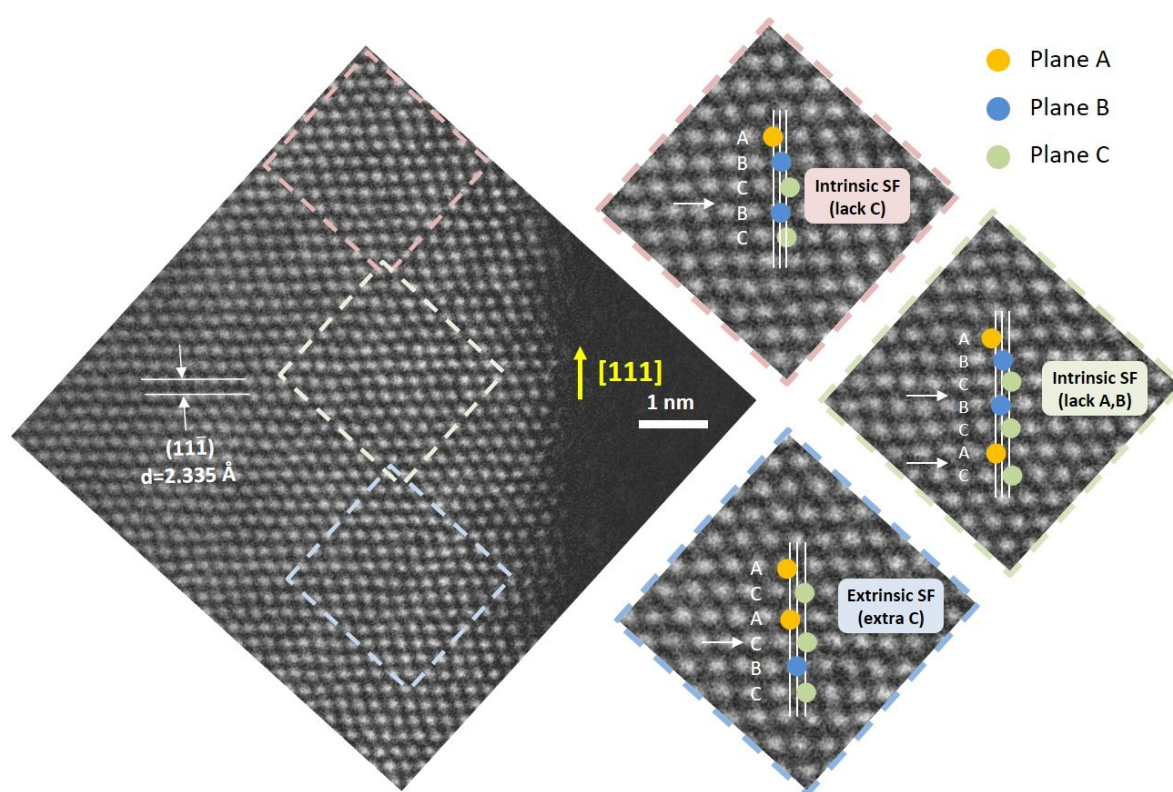

Fig. S1 Two types of stacking faults in the Ag NW are known as Intrinsic stacking fault (ISF, pink and green dashed box) and Extrinsic stacking fault (ESF, Blue dashed box)

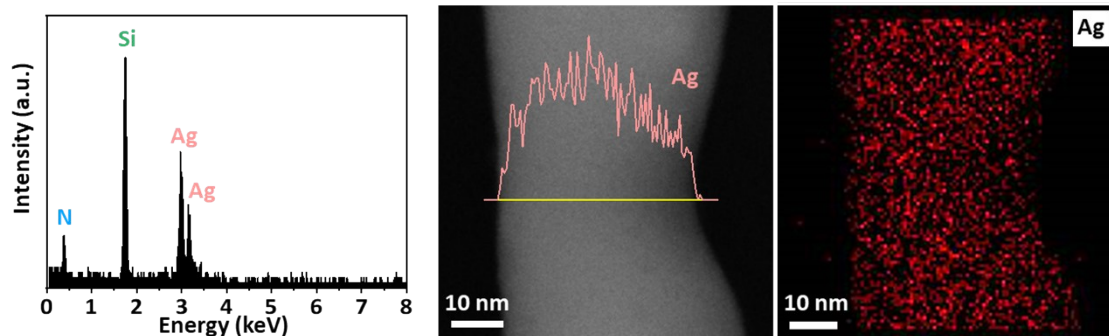

Fig. S2 EDS spectra and line scan indicating that no remaining surfactant or organic layer present in the NW. The signal from the Si and N in the EDS spectra are from the homemade  $\text{Si}_3\text{N}_4$  TEM membrane.

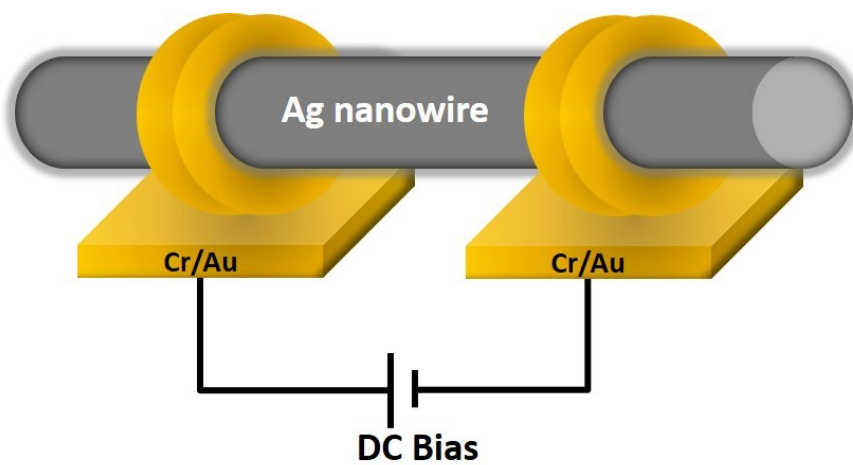

Fig. S3 Schematic diagram of Ag NW connected with Cr/Au electrode for in-situ observation of Ag NW under DC bias.

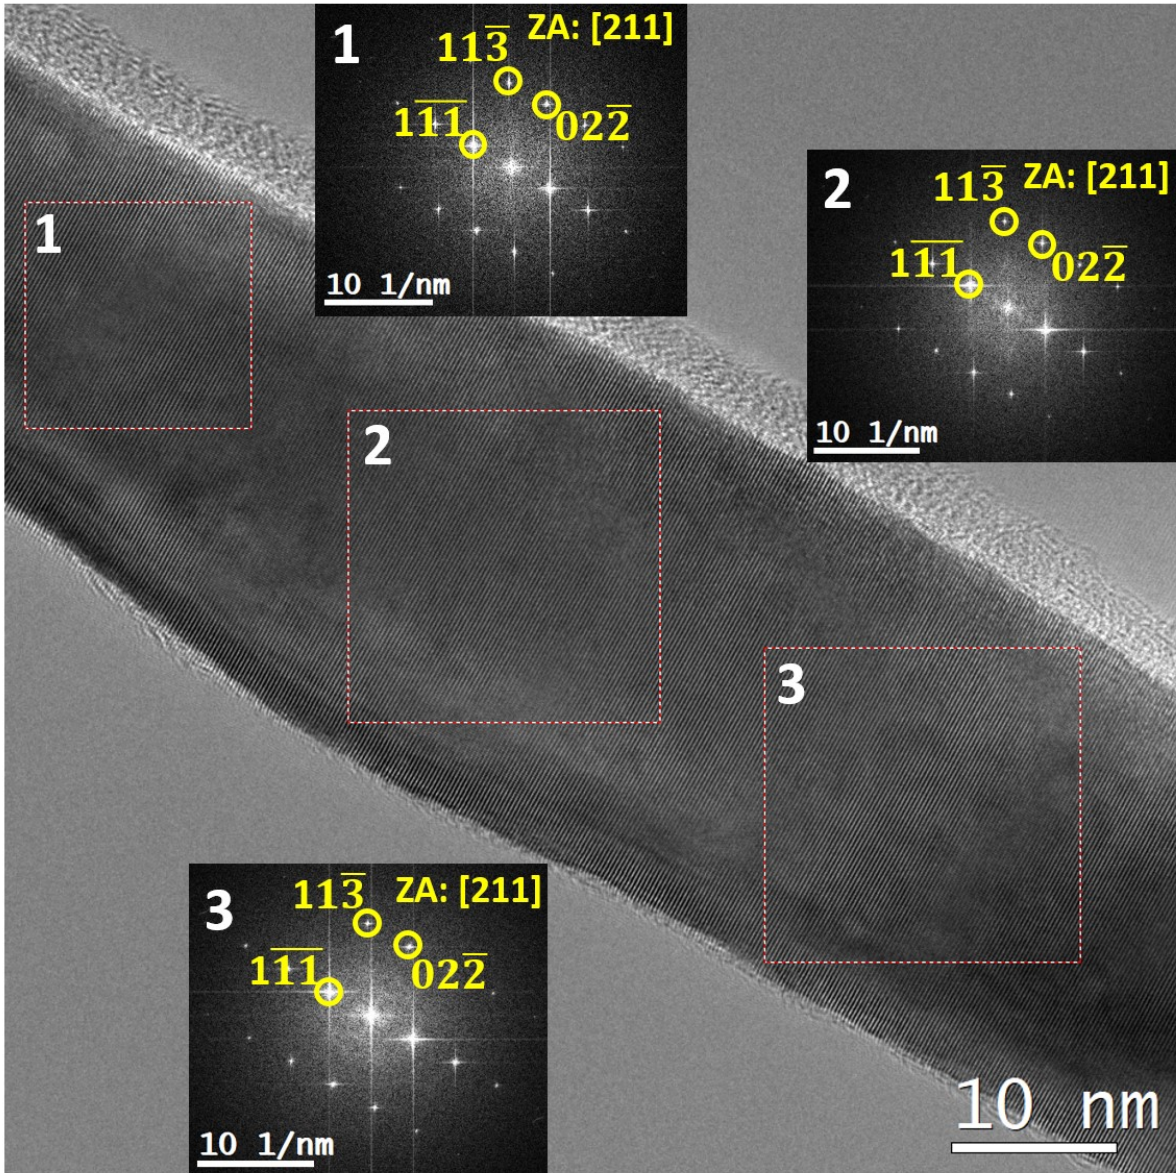

Fig. S4 HRTEM image of the Ag NW w/o stacking faults. Insets 1-3 are diffraction patterns from area 1-3 in the image. Both the image and the diffraction pattern confirm that Ag NW we analysed is without stacking faults.
